# Supplementary material for: Extracurricular activity profiles and wellbeing in middle childhood: A population-level study
Source: PubMed Central journal article supplement (PMC6619656; doi:10.1371/journal.pone.0218488), 2019-07-10
Supplement: pone.0218488.s001.pdf [file pone.0218488.s001.pdf]

**S1 Table.** Results of Post-hoc analyses of pairwise comparisons

|                      |          | Optimism         |           |           |          | Life Satisfaction |           |           |          | Self-Concept     |           |           |          | Perceived Health |           |           |          |
|----------------------|----------|------------------|-----------|-----------|----------|-------------------|-----------|-----------|----------|------------------|-----------|-----------|----------|------------------|-----------|-----------|----------|
| <u>CL(i) - CL(j)</u> |          | <u>M(i)-M(j)</u> |           |           |          | <u>M(i)-M(j)</u>  |           |           |          | <u>M(j)-M(j)</u> |           |           |          | <u>M(i)-M(j)</u> |           |           |          |
| <u>i</u>             | <u>j</u> | <u>MD</u>        | <u>LL</u> | <u>UL</u> | <u>d</u> | <u>MD</u>         | <u>LL</u> | <u>UL</u> | <u>d</u> | <u>MD</u>        | <u>LL</u> | <u>UL</u> | <u>d</u> | <u>MD</u>        | <u>LL</u> | <u>UL</u> | <u>d</u> |
| Ind. activities      | All      | <u>-0.14</u>     | -0.20     | -0.08     | -.15     | <u>-0.11</u>      | -0.17     | -0.05     | -.12     | <u>-0.09</u>     | -0.14     | -0.04     | -.10     | <u>-0.10</u>     | -0.14     | -0.05     | -.14     |
| Ind. activities      | Sports   | <u>-0.09</u>     | -0.13     | -0.04     | -.11     | <u>-0.10</u>      | -0.15     | -0.06     | -.14     | <u>-0.10</u>     | -0.14     | -0.07     | -.18     | <u>-0.08</u>     | -0.11     | -0.04     | -.13     |
| Ind. activities      | None     | 0.02             | -0.02     | 0.07      | .03      | -0.01             | -0.05     | 0.04      | -.02     | -0.01            | -0.05     | 0.03      | -.02     | 0.02             | -0.02     | 0.05      | .01      |
| All                  | Sports   | <u>0.06</u>      | 0.01      | 0.11      | .04      | 0.00              | -0.04     | 0.05      | -.02     | -0.02            | -0.06     | 0.02      | -.07     | 0.02             | -0.02     | 0.06      | .03      |
| All                  | None     | <u>0.16</u>      | 0.11      | 0.21      | .17      | <u>0.10</u>       | 0.05      | 0.15      | .10      | <u>0.08</u>      | 0.04      | 0.12      | .10      | <u>0.11</u>      | 0.07      | 0.15      | .16      |
| Sports               | None     | <u>0.11</u>      | 0.08      | 0.14      | .14      | <u>0.10</u>       | 0.07      | 0.13      | .12      | <u>0.09</u>      | 0.07      | 0.12      | .15      | <u>0.09</u>      | 0.07      | 0.15      | .15      |

*Note.* Ind. Activities = Individual activities (i.e., Educational programs, Music/Arts, Individual Sports).

Tukey HSD adjustment was used for multiple pairwise comparisons.

Underlined values represent statistical group difference.

CL = (Latent) Classes, M = mean, MD = mean difference, LL = lower limits of 95% confidence interval, UL = upper limits of 95% confidence interval;

*d* = Cohen's *d*
